# Establishment of morphological atlas of *Caenorhabditis elegans* embryo with cellular resolution using deep-learning-based 4D segmentation

Jianfeng Cao<sup>1,§</sup>, Guoye Guan<sup>2,§</sup>, Ming-Kin Wong<sup>3</sup>, Lu-Yan Chan<sup>3</sup>,

Chao Tang<sup>2,4,5\*</sup>, Zhongying Zhao<sup>3,6\*</sup> & Hong Yan<sup>1\*</sup>

<sup>1</sup>*Department of Electrical Engineering, City University of Hong Kong, Hong Kong, China*

<sup>2</sup>*Center for Quantitative Biology, Peking University, Beijing, China*

<sup>3</sup>*Department of Biology, Hong Kong Baptist University, Hong Kong, China*

<sup>4</sup>*Peking-Tsinghua Center for Life Sciences, Peking University, Beijing, China*

<sup>5</sup>*School of Physics, Peking University, Beijing, China*

<sup>6</sup>*State Key Laboratory of Environmental and Biological Analysis, Hong Kong Baptist University, Hong Kong, China*

*\*Corresponding authors: [tangc@pku.edu.cn](mailto:tangc@pku.edu.cn), [zyzhao@hkbu.edu.hk](mailto:zyzhao@hkbu.edu.hk), [h.yan@cityu.edu.hk](mailto:h.yan@cityu.edu.hk)*

*§These authors contributed equally to this work.*

**Cell lineage consists of cell division timing, cell migration and cell fate, which are highly reproducible during the development of some nematode species, including *C. elegans*. Due to the lack of high spatiotemporal resolution of imaging technique and**

**reliable shape-reconstruction algorithm, cell morphology have not been systematically characterized in depth over development for any metazoan. This significantly inhibits the study of space-related problems in developmental biology, including cell segregation, cell-cell contact and cell shape change over development. Here we develop an automated pipeline, CShaper, to help address these issues. By quantifying morphological parameters of densely packed cells in developing *C. elegans* embryo through segmentation of fluorescence-labelled membrane, we generate a time-lapse framework of cellular shape and migration for *C. elegans* embryos from 4- to 350-cell stage, including a full migration trajectory, morphological dynamics of 226 cells and 877 reproducible cell-cell contacts. In combination with automated cell tracing, cell-fate associated cell shape change becomes within reach. Our work provides a quantitative resource for *C. elegans* early development, which is expected to facilitate the research such as signaling transduction and cell biology of division.**

## **1 Introduction**

2 Embryogenesis in metazoans is a spatio-temporal biological process formed by a series  
3 of multicellular structure evolution including proliferation and morphogenesis. As “eu-  
4 tely” *C. elegans* has invariant and reproducible cell lineage consisting of division tim-  
5 ing, migration trajectory and fate specification for each cell<sup>1</sup>, it has been wildly used as

6 an animal model for developmental biology research<sup>2</sup>. Thanks to advanced imaging e-  
7 quipment with single-cell resolution as well as automatic cell-tracing softwares<sup>3-5</sup>, a few  
8 researchers have made great effort to quantitatively reconstruct its developmental atlas  
9 in several dimensions of developmental properties, including cell division timing<sup>6</sup>, gene  
10 expression and morphogenesis<sup>7,8</sup>, cell-cell contact mapping and signaling<sup>9,10</sup>. Despite al-  
11 l this, little is known about cell morphology experimentally and systematically, due to  
12 lack of high-resolution cell membrane signaling marker and reliable imaging-based algo-  
13 rithm for cell segmentation, in particular for late stage which has hundreds of cells<sup>11,12</sup>.  
14 Cell morphology (e.g. cell shape, cell volume, cell-cell contact) is also a set of critical  
15 developmental properties and information for metazoan embryogenesis, which is tight-  
16 ly correlated to cell-cycle control<sup>13-15</sup>, spindle formation<sup>16</sup>, cell-fate symmetry break-  
17 ing and differentiation<sup>17,18</sup>, intercellular signal transmission<sup>10,12,19,20</sup>, cytomechanics and  
18 morphogenesis<sup>21-24</sup>, etc.

19       Recent studies also emphasized the necessity of 3-dimensional cellular segmenta-  
20 tion aside from the nucleus<sup>25,26</sup>. With large quantities of volumetric data involved in the  
21 embryogenesis of *C. elegans*, visual inspection on these images is time-consuming and  
22 error-prone. Computer-assisted analysis accommodates the difficulty in large-scale image  
23 segmentation, paving the way to efficient and accurate researches. Compared to manual  
24 annotation, automated image analysis has better objective quantification, consistency and

25 reproducibility. Confocal microscopy is popularly used in 3D imaging, which allows op-  
26 tical section in tissue or even cells at different depth. Whereas large quantities of works  
27 have been proposed to segment nuclei or cells in 2D<sup>27-30</sup>, cell's morphological features  
28 varies from those in 3D. Without information between slices, simply stacking 2D seg-  
29 mentations into 3D volume may yield misalignment in the depth direction. Some recent  
30 methods have addressed cell tracing based on nucleus information<sup>31</sup>, however, they can  
31 hardly characterize cell geometry information (e.g. cell volume, cell surface area, cell  
32 topology, cell-cell neighbour relationship). The performance of 3D cell segmentation suf-  
33 fers from three factors. First, unlike the nuclei, which are thick and separated ellipsoid  
34 components, cell membranes are thin planar structures, forming complicated networks  
35 by contacting with each other. Second, compared to plant tissue, highly dynamic cellular  
36 morphology in *C. elegans* limits the application of diverse techniques based on deformable  
37 model. Furthermore, as shown in Fig. S1A, laser attenuation makes the segmentation more  
38 challenging in deeper slices. Theoretically, large exposure times can improve the image  
39 quality. Poisonous laser rays, however, could harm or even kill cells in time-lapse imaging  
40 process.

41 In the last few decades, Several attempts have been made to leverage the segmenta-  
42 tion performance on microscopy. Classical techniques are based on pre-defined model and  
43 image intensity features. Among these, active contours and level sets are two of the most

44 compelling methods in segmenting microscopy. Active contour deals with segmentation  
45 as a energy minimization process where the image forces pull the contour toward the ob-  
46 ject boundary and internal forces resist the deformation. Different evolution equations,  
47 mediating the internal and external forces, are designed to control the deformation process  
48 precisely<sup>32-35</sup>. To diminish the difficulty in finding desirable forces representation, level set  
49 is used to embed the boundary curve as a real-valued solution of an equation, which makes  
50 it straightforward to follow topology changes, such as splits and holes. By using coupling  
51 constrains in level set evolution, Nath et al. proposed a computationally efficient method  
52 to segment hundreds of cells simultaneously<sup>27</sup>. Kiss et al. used level set to segment plant  
53 tissues at multiple scales, which reduced the error at blurry surface effectively<sup>36</sup>. Instead  
54 of processing multiple slices in 3D simultaneously, Sharp et al. described the possibility  
55 of inferring 3D shape features indirectly from 2D images in a statistical way<sup>37</sup>. In practice,  
56 however, the performance of level set is limited by considerable computational complexity  
57 and incomplete cell boundary. Methods driven by energy functions could be problematic  
58 due to the presence of artifacts and lack of strong edge information. Xing et al. provides  
59 a compressive review about classical cell segmentation techniques<sup>38</sup>. Data-dependent and  
60 parameterized pre-processing stage is always needed in these methods, otherwise the sys-  
61 tem would be exposed to under-or-over segmentation errors.

62 Recently, deep learning based methods provide a promising tool for recognition

63 tasks, such as denoising<sup>39-42</sup>, tumor segmentation<sup>43,44</sup> and image synthesis<sup>45-48</sup>. Compared  
64 to classical methods, convolutional neural network (CNN) shows remarkable improve-  
65 ment on biological image analysis by mining subtle texture and shape changes. Since  
66 U-net was proposed by Ronneberger et al.<sup>49</sup>, this kind of encoder-and-decoder structure  
67 has extensively promoted learning-based segmentations on medical images<sup>50</sup>. For fluores-  
68 cent images, the ability of deep learning in discriminating and filtering useful information  
69 is further verified<sup>48,51</sup>. To mitigate the complexity in cellular networks, the segmentation  
70 is usually decomposed into multiple intermediate tasks, such as nucleus detection and  
71 membrane segmentation<sup>2,52,53</sup>. 3D convolution attracts increasing attention because of its  
72 advantage in combining multi-directional information. However, 3D deep network relies  
73 heavily on computation resource and training data. Some works are proposed to alleviate  
74 the computational complexity in 3D<sup>54-57</sup>.

75 In this work, we propose a complete pipeline CShaper for analyzing cellular shapes  
76 in *C. elegans*. Deep learning is utilized to accommodate the complications associated in  
77 volumetric *C. elegans* embryo. First, instead of segmenting cells as a binary classification  
78 task directly, CShaper generates the discrete distance map from the membrane stack image  
79 with a distance regularized neural network DMapNet. Second, Delaunay triangulation is  
80 employed to construct a weighted graph based on the binary segmentation extracted from  
81 the DMapNet. Local minima are clustered as different seeds for watershed segmentations.

82 Last, nucleus images are used to filter out hollow regions among cells. Automatic seeding  
83 procedure precludes substantial computations involved in most current works due to the  
84 over-segmentation problem. After adjusting position variations in wide-type embryos, we  
85 establish a spatio-temporal morphogenesis reference for *C. elegans* embryogenesis during  
86 4- to 350-cell stage. Both individual evaluation and experimental verification on previous  
87 conclusions demonstrate the unprecedented performance of CShaper.

## 88 **Results**

89 By measuring the consistency between segmentations of prevalent methods and manual  
90 annotations, CShaper outperforms regarding both accuracy and robustness. Besides, based  
91 on the segmentations, cell volume and cell surface area, which usually get involved in cell-  
92 cycle control and cell-fate specification<sup>13-18</sup>, were firstly investigated and found to have  
93 high reproducibility among individuals.

94 **Dataset** In *C. elegans* embryo, nucleus and membrane were stained in vivo with mCherry  
95 marker on nucleus and GFP marker on cell membrane, respectively. 4D (space + time)  
96 nucleus and membrane stacks from two channels were collected by Leica SP8 confocal  
97 microscopy at 1.5-min interval. All images with a resolution  $512 \times 712 \times 70$  (voxel size  
98  $0.09 \times 0.09 \times 0.43\mu\text{m}$ ) were resized into isotropic volume images with a resolution  $205 \times$

99  $285 \times 134$  (voxel size  $0.22 \times 0.22 \times 0.22 \mu\text{m}$ ) before analysis. Different wide-type embryos  
100 are used in different stages as listed in **Supplementary Table. S1**.

101 Manual annotations are needed to train the DMapNet and compare different meth-  
102 ods. In plant tissue, cells are encased within cell walls that physically adhere to their  
103 neighbors, yielding better image quality and uniform size. In the animal embryo, howev-  
104 er, irregular cells are separated by thin membrane, making it much challenging to segment  
105 each cell accurately. Besides, since only 2D slice can be shown on computer screen, full  
106 annotation of volumetric data is very tedious. Therefore, the gold standard is produced  
107 by semi-automatic software with the results revised by experts. Membrane stacks are  
108 pre-segmented by 3DMMS<sup>58</sup> first, and then checked by two experts with ITK-SNAP<sup>59</sup>  
109 slice-by-slice. Nucleus image is also imposed to prevent invalid gaps between cells. Please  
110 note that annotations are composed by cell-wise regions, which can be transformed into  
111 membrane mask with morphological operations. Most annotations have less than 100 cells  
112 to prevent annotation quality deteriorating with the image quality and segmentation error  
113 of 3DMMS. Although DMapNet is trained on frames within 150-cell stage, experiments  
114 show that it is able to process the embryo in 350-cell stage with high quality owing to the  
115 multi-scale input features. All datasets companied with annotations or segmentations will  
116 be publicly available.



117 **Comparison with other method** Here a through comparison among CShaper and other  
118 state-of-the-art methods is discussed. To be a fair comparison, watershed algorithm is  
119 also used as a postprocessing procedure in 3D U-net and FusionNet where only binary  
120 membrane segmentation is available. However, different from CShaper, the seeds are  
121 collected from the nucleus locations generated by AceTree, which theoretically produces  
122 more accurate estimation on real nucleus images. In order to compare the CShaper without  
123 distance learning strategy, the CShaper was changed to a naive binary segmentation by  
124 replacing the last layer of DMapNet (see Methods) with two channel filters, while other  
125 parameters kept the same as that in CShaper.

126 Experimental results are reported in Fig. 1. It shows that CShaper achieves much  
127 higher accuracy on three different wide types at various time points (Fig. 1A), which  
128 validates the accuracy and generality of our approach. Such improvement benefits from:  
129 1). CShaper allows segmentation on weak boundaries because of the distance constrained  
130 learning strategy (**Supplementary Fig. S1**); 2). In RACE and FusionNet, segmentation-  
131 s are implemented slice-by-slice. Although slices are combined into stack statistically  
132 during the post-processing stage, few inter-slice information, if any, in raw images are uti-  
133 lized to establish a promising result; 3). In contrast to naive binary segmentation methods,  
134 DMapNet reaches a compromise at the membrane boundary by constructing a relatively s-  
135 mooth transition between the membrane and the background. This encourages the network

<sup>136</sup> to learn more morphological features around the membrane.

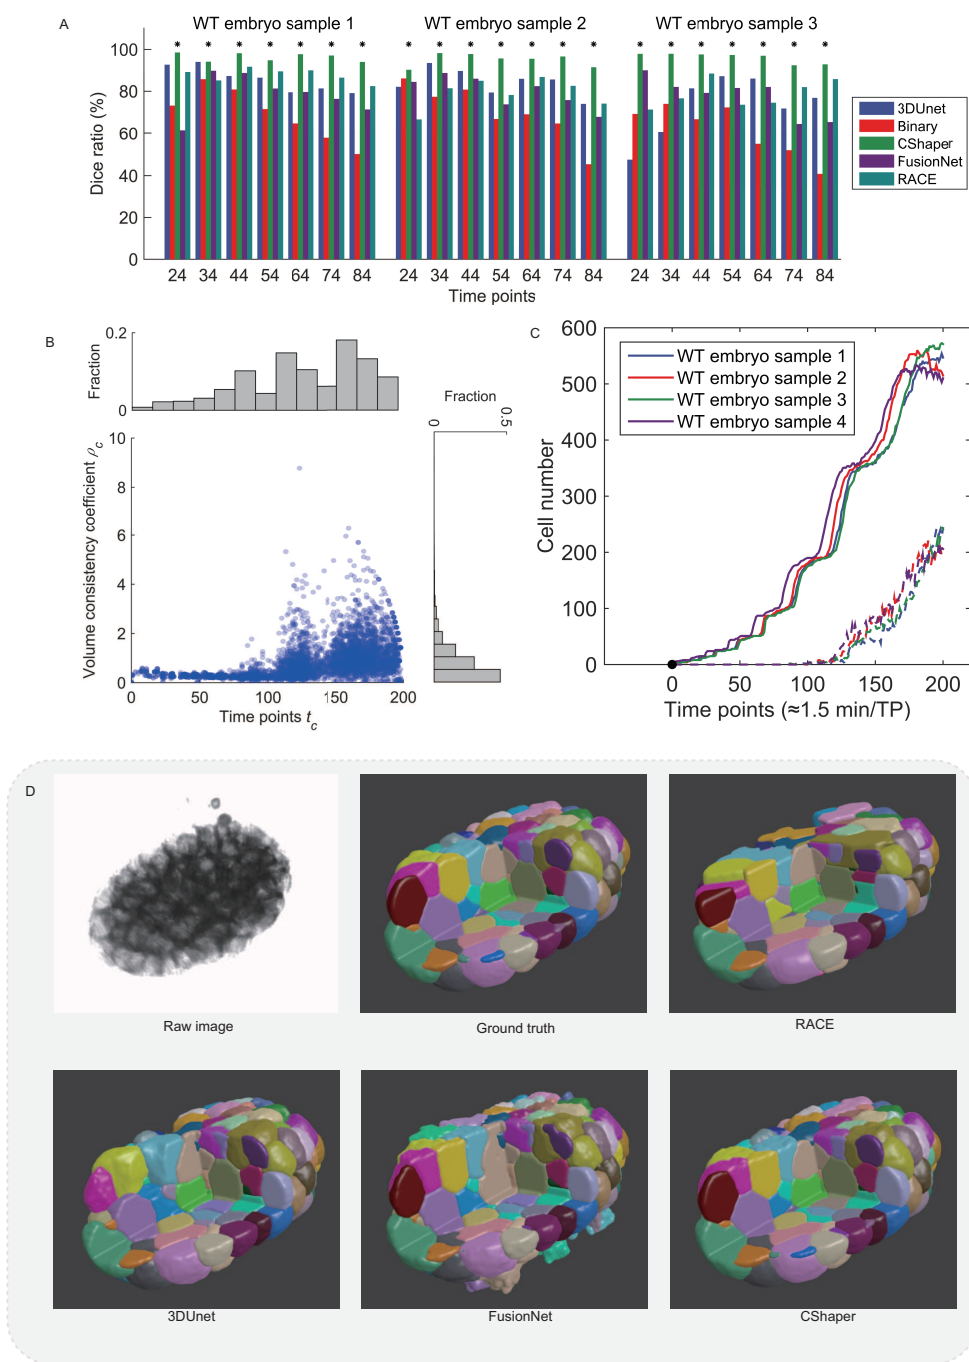

Figure 1: Analysis on the segmentation results. **(A)** Comparison on the Dice ratio of the segmentations from 3D U-Net, FusionNet, RACE, CShaper and naive binary. All values are calculated based on seven manual annotations of three wide types, respectively. **(C)** The distribution of cell volume consistency  $\rho_c$  with respect to time  $t_c$  in four embryos. **(D)** The distribution of lost nucleus with respect to time in four embryos. **(D)** Comparison of the segmentations from RACE, 3DUnet, FusionNet and CShaper.

137 As Fig. 1D shows, RACE and FusionNet suffer severe leakage at the bottom layers of  
138 the embryo, where the membrane signal is too weak to be discriminated because of laser  
139 attenuation. 3DUnet provides better feature extraction by applying convolution between  
140 slices. However, partial membrane, especially at the boundary of the embryo, is still  
141 too weak to be recognized, which deteriorates the lost cells in the periphery. Under the  
142 distance map constraint, CShaper learns to depict weak or lost membrane as annotated in  
143 the training data.

144 **Robustness on extensive datasets** To measure the performance of CShaper on more  
145 datasets, whose annotations are not available, we quantitatively measured the volume con-  
146 sistency, as well as the lost nucleus, of serial segmentations. CShaper segments each  
147 embryo independently, frame by frame, without capturing typical temporal patterns across  
148 time. Successive imaged cells, theoretically, should have temporally consistent volume, or  
149 with limited variance when considering biological dynamics. Therefore, we can examine  
150 the performance of CShaper on extensive time-lapse stacks by analyzing series informa-  
151 tion. Besides the membrane images, their corresponding nucleus stacks were processed by  
152 AceTree, which can be used to identify cell's name and the lifespan of each nucleus. We  
153 defined volume consistency and ratio of lost nuclei to estimate the error of segmentations  
154 in four wide-type embryos with 200 frames in each, which are used for following spatio-  
155 temporal reference reconstruction. A index matrix  $\mathbf{V}_{tc|t \in [1,2,3,\dots,200], c \in C}$  was constructed

156 such that “0” represents the existence of cell  $c$  at time  $t$ , otherwise the element is kept as  
157  $NaN$  (invalid value), where  $C$  is the collection of cell names. We assembled cell’s volume  
158 of all segmentations of one wide-type embryo into the matrix  $\mathbf{V}$ . Then for each cell  $c$ , the  
159 volume consistency  $\rho_c$  is defined as the ratio of the standard deviation and mean applied  
160 to volume series  $\mathbf{V}_{t,c|t=1,2,\dots,200}$ . Note that all invalid values  $NaN$  were not taken into  
161 consideration. The start time point of cell  $c$  is also labelled as  $t_c$  in order to discriminate  
162 the error at different developmental stages. Larger  $\rho_c$  means the segmentation of cell  $c$  has  
163 better temporal consistency, yielding higher performance. The distribution of consistency  
164 coefficients  $(t_c, \rho_c)$  of the four wide-type embryos is plotted in Fig. 1B. In these segmen-  
165 tations, most cells have relative small volume variation through the development, although  
166 temporal information are not applied to CShaper in the segmentation procedures intention-  
167 ally. With the number of cells increasing over time, the cell volume becomes smaller and  
168 the signal-to-noise ratio decreases dramatically, which makes it more challenging to be  
169 segmented precisely. Simultaneously, because nuclei are not involved in the segmentation  
170 stage, nucleus information processed by AceTree can be used to justify the accuracy. In  
171 Fig. 1C, we show the ratio of lost nucleus (see **Supplementary note 1**) at different time  
172 points. Few cells before 200-cells stage are lost in the four embryos. With the number  
173 of cells increasing and density of fluorescence shrinking, the number of cells that are lost  
174 becomes larger when entering the eighth round of cell divisions. However the lost cells

175 in the entire embryos only occupy a small proportion (around 11.9% at 350-cells). There-  
176 fore, we can safely conclude that CShaper has superior ability on segmenting extensive  
177 time-lapse embryo images.

178 **Establishment of spatio-temporal morphogenesis reference** Using experimental meth-  
179 ods and quality-control standards described before<sup>6,60</sup>, 4 wild-type embryos within 350-  
180 cell stage were used to construct the morphogenesis reference of early *C. elegans* embryo.  
181 All the 17 embryos (4 embryos with both nucleus and membrane markers and the other 13  
182 embryos with only nucleus marker) were first linearly normalized to minimize their posi-  
183 tional variation according to a proposed computational pipeline<sup>60</sup>; secondly, translation in  
184  $yz$  plane and rotation around  $x$  axis were successively performed on the 4 embryos with  
185 membrane marker, to ensure the compressed contact faces were parallel to  $xz$  plane; third-  
186 ly, translation in  $xz$  plane and rotation around  $y$  axis were successively performed on the  
187 4 embryos, so that their projection to  $xz$  plane could be embedded by a centralized ellipse  
188 with minimum area; after that, the 4 embryos were rescaled to the same length in  $x$ ,  $y$ ,  $z$   
189 directions; at last, the other 13 embryos were normalized to the nucleus-position averages  
190 of the 4 embryos using methods proposed previously<sup>60</sup> (**Supplementary Fig. S2**).

191 **Morphological developmental properties at single-cell level** Using the cell-segmentation  
192 algorithm designed above, a total of 226 cells ( $\approx 70\%$ ) among AB4-128, MS1-MS16,

193 E1-E8, C1-C8, D1-D4, P3 and P4 were recorded with complete lifespans and segmented  
194 without any error in all the 4 wild-type embryos, generating 4-dimensional morphological  
195 dynamic information at single-cell level with high confidence, such as cell shape (e.g. cell  
196 volume, cell surface area, topology) and cell-cell contact (e.g. contact duration, contact  
197 area, neighbour relationship) (Fig. 2, **Supplementary Fig. S3**)(Table. S2).

198 To test the data quality and further refine the information useful to biological study,  
199 here we focus on three low-dimensional but valuable developmental properties : cell vol-  
200 ume, cell surface area and cell-cell contact. Cell volume and cell surface area, which  
201 usually get involved in cell-cycle control and cell-fate specification<sup>13-18</sup>, were firstly inves-  
202 tigated and found to have high reproducibility among individuals (Fig. 2 **A,B**). Cell-fate  
203 induction (e.g. Wnt signaling<sup>19,20</sup> and Notch signaling<sup>10,61</sup>) during embryo development  
204 intimately depends on continuous, sufficient and direct physical contact between specif-  
205 ic cells for interaction between receptors and ligands and consequent effective signaling  
206 transmission. Based on the contact relationship acquired from raw experimental images  
207 and automatic segmentation, we filtered the most reliable and valid contact between two  
208 specific cells by adding three empirical criteria<sup>10</sup>, **1**) with contact area larger than 1/36 of at  
209 least one cell's surface area (sufficiency,  $S_{\text{contact}}/S_{\text{surface}} > 1/36$ ); **2**) with contact duration  
210 no shorter than 3 minutes, i.e. consecutive two time points (continuity,  $T_{\text{contact}} \geq 3 \text{ min}$ )  
211 ; **3**) be reproducible in all the 4 wild-type embryos (reproducibility,  $N_{\text{replicate}} = N_{\text{embryo}}$ ).

212 At last, totally 877 contact pairs of two specific cells are identified (Fig. 2C). Cells with  
 213 missing information are listed in **Supplementary Table. S3**. Please note that the criteria  
 214 are set arbitrarily and can be readjusted for different research purposes.

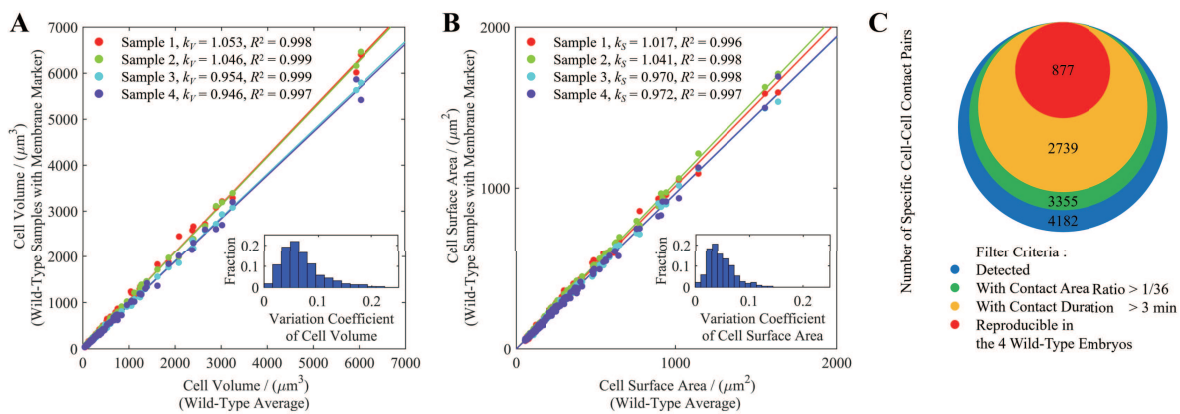

Figure 2: Reproducibility, precision, validity of cell volume, cell surface area, and cell-cell contact. All the cells involved are completely recorded and segmented without any error during their lifespans (Table 1). (A) Highly reproducible volume of cells in the 4 wild-type embryos. Inset, variation coefficients of cell volume. (B) Highly reproducible surface area of cells in the 4 wild-type embryos. Inset, variation coefficients of cell surface area. (C) Selection filter of sufficient, continuous and reproducible cell-cell contact pairs according to a set of arbitrary criteria.

## 215 Discussion

216 Cell morphology is critical and useful developmental property involved with different bio-  
 217 logical process. In this paper, a complete pipeline CShaper for analyzing spatio-temporal  
 218 morphological features of *C. elegans* embryo at single-cell level is proposed. The CShaper  
 219 benefits from the well-defined distance learning task. By learning to capture multiple



220 discrete distances, DMapNet extracts the membrane mask by considering shape infor-  
221 mation, instead of just intensity features. Remarkable performance is examined by both  
222 intrinsic geometric constrains and previous notable discoveries. Based on these accurate  
223 segmentations, we merged the embryos and quantitatively generated a spatio-temporal  
224 morphogenesis reference for 4- to 350-cell stage of *C. elegans* embryogenesis, including  
225 single-cell properties such as cell shape (e.g. cell volume, cell surface area, topology),  
226 cell-cell contact (e.g. contact duration, contact area, neighbour relationship), cell posi-  
227 tional variability, etc. In all, 226 cells with complete lifespans and dynamic morphology  
228 trajectory were produced. Furthermore, a total of 877 contact pairs between two specific  
229 cells were identified with high reproducibility, continuous contact duration and sufficient  
230 contact area, which could be a solid foundation for searching potential signaling pathways  
231 between cells. Our work provides a quantitative and statistical framework for *C. elegans*  
232 morphogenesis, which is a powerful resource to push forward multiple biological research  
233 fields like signaling transmission, fate specification and asymmetric segregation. Next, we  
234 discuss the coincidence of CShaper with three well-known experimental discoveries and  
235 inspect its valuable applications on different datasets.

236 **Verifications on previous studies** To further validate the *C. elegans* morphogenesis ref-  
237 erence with single-cell developmental properties (e.g. cell volume, cell position, cell-cell  
238 contact), here we use our new quantitative data to repeat and verify three separate sets of

239 experimental conclusions about *C. elegans* embryonic development<sup>10,13,61–63</sup>.

240 Firstly, Arata et al. found the power law relationship between cell cycle duration and  
241 cell volume in the early *C. elegans* development, that is, AB and MS cells adopt the same  
242 power exponent ( $\approx -0.27$ ) while C and P cells adopt another different power exponent ( $\approx$   
243  $0.41$ )<sup>13</sup>. Under log-log scale coordinates system, we also performed linear fitting between  
244 cell cycle duration and cell volume and found that the two exponents obtained (AB and  
245 MS,  $-0.2990$  ; C and P,  $-0.4244$ ) are very close to the values proposed before (Fig. 3A, B).

246 Secondly, Li et al. uncovered the “low-high-low” dynamic pattern of cell positional  
247 variability during 4- to 350-cell stage of *C. elegans* embryogenesis<sup>62</sup>. Using the same eval-  
248 uation method on positional variability (RMSD) proposed before, we used our normalized  
249 cell positions (nucleus positions) to calculate their spatial variation and reconstructed a  
250 similar curve with a turning point occurring when cell number reaches around ninety (Fig.  
251 3C).

252 Thirdly, several intercellular signaling based on accurate cell-cell contact have been  
253 identified to play important roles in asymmetric segregation, spindle formation and cell-  
254 fate induction<sup>10,19,20,61,63</sup>. Here, we compared the known cell-cell signaling pairs with our  
255 cell-cell contact dataset (877 pairs in total). The majority of known contact pairs past

256 through our filter criteria with continuous contact duration as well as sufficient contact  
257 area, except  $C \rightarrow A_{Bar}$  and  $MS \rightarrow A_{Balp}$  (Table. 1). The contact between C and  
258  $A_{Bar}$  can be found in all the 4 wild-type embryos with at least two consecutive time point  
259 ( $\approx 3$  minutes), however, the relative contact area is smaller than the arbitrary filter criterion  
260 ( $S_{contact}/S_{surface} > 1/36$ ) in one of the embryos (Fig. 2C), revealing that the threshold  
261 for identifying valid cell-cell contact should be reestimated and readjusted on the basis of  
262 the actual biological scenes (e.g. surface density of ligands or receptors), nevertheless,  
263 the original contact information from image segmentation is objective and can be used for  
264 different research purposes. For the other contact pair  $MS \rightarrow A_{Balp}$ , one of the cells  
265  $A_{Balp}$  are missing (i.e. fail to be segmented) due to its location near the top of embryo  
266 and consequent dim fluorescent signal.

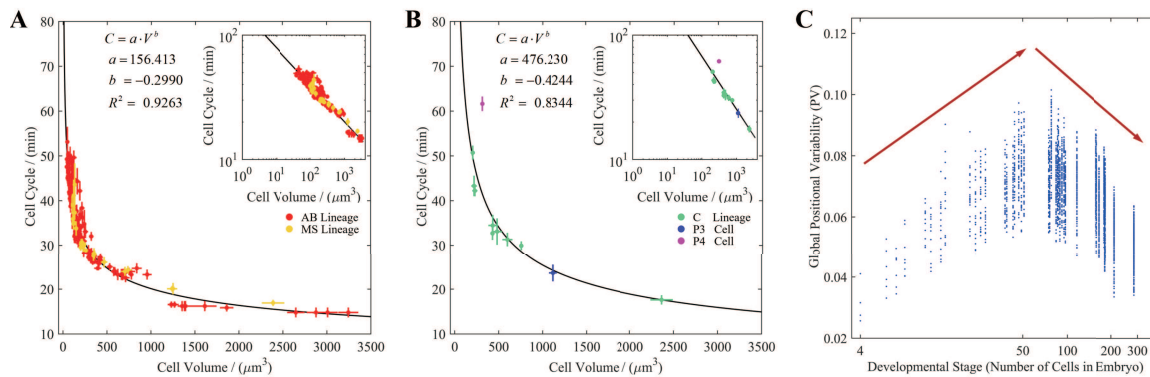

Figure 3: Verification of our newly proposed morphogenesis reference using experimental results from References<sup>13,62</sup>. **(A)** Power law relationship between cell cycle duration and cell volume in AB and MS cells, with power exponent  $\approx -0.2990$ . Inset, illustration in log-log scale coordinates system. **(B)** Power law relationship between cell cycle duration and cell volume in C and P cells, with power exponent  $\approx -0.4244$ . Inset, illustration in log-log scale coordinates system. **(C)** “Low-high-low” dynamic pattern of cell positional variability during 4- to 350-cell stage.

Table 1: Verification of our newly proposed morphogenesis reference using experimental results from references.

| Cell-Cell Contact Pair | Validity & Reproducibility | Contact Duration (min) | Relative Contact Area Surface (%) | Relative Contact Area Surface (%) | Remark                             | Ref.                                                  |
|------------------------|----------------------------|------------------------|-----------------------------------|-----------------------------------|------------------------------------|-------------------------------------------------------|
| P2 → EMS               | 4/4                        | 7.04                   | 9.61±2.30                         | 12.31±2.15                        | Wnt Signaling                      | Thorpe et al <sup>19</sup>                            |
| MS → ABal              | 4/4                        | 7.04                   | 15.70±2.60                        | 15.03±2.66                        | Latrophilin Signaling              | Langenhan et al <sup>63</sup>                         |
| C → ABar               | 3/4#                       | 7.04                   | 2.37±2.57                         | 2.60±2.79                         | Wnt/ $\beta$ -catenin Signaling    | Walston et al <sup>20</sup>                           |
| $\beta$ 2 → ABp        | 4/4                        | 5.63                   | 13.38±1.99                        | 20.47±2.01                        | Notch Signaling (1 <sup>st</sup> ) | Priess et al <sup>61</sup>                            |
| MS → ABalp             | /*                         | /                      | /                                 | /                                 | Notch Signaling (2 <sup>nd</sup> ) | Chen et al <sup>10</sup> , Priess et al <sup>61</sup> |
| MS → ABara             | 4/4                        | 5.63                   | 9.28±1.19                         | 12.98±2.14                        | Notch Signaling (2 <sup>nd</sup> ) | Chen et al <sup>10</sup> , Priess et al <sup>61</sup> |
| ABalapa → ABplaaa      | 4/4                        | 5.63                   | 14.22±3.86                        | 11.13±3.26                        | Notch Signaling (3 <sup>rd</sup> ) | Chen et al <sup>10</sup> , Priess et al <sup>61</sup> |
| ABalapp → ABplaaa      | 4/4                        | 5.63                   | 13.06±3.91                        | 10.66±2.65                        | Notch Signaling (3 <sup>rd</sup> ) | Chen et al <sup>10</sup> , Priess et al <sup>61</sup> |
| MSapp → ABplpapp       | 4/4                        | 5.63                   | 12.58±3.69                        | 13.92±3.86                        | Notch Signaling (4 <sup>th</sup> ) | Chen et al <sup>10</sup> , Priess et al <sup>61</sup> |
| MSapppp → ABplpppp     | 4/4                        | 5.63                   | 7.58±0.21                         | 9.19±2.61                         | Notch Signaling (5 <sup>th</sup> ) | Chen et al <sup>10</sup> , Priess et al <sup>61</sup> |

# Without complete reproducibility in the 4 wild-type embryos under designed filter criteria.

\* Including missing cell (ABalp).

267 **Application on different datasets** To evaluate the performance of CShaper on different  
268 kinds of images, the plant tissue images used by Fernandez et al<sup>64</sup> were segmented with  
269 our method. In the work, *Arabidopsis thaliana* stem cells were processed with MARS<sup>65</sup>,  
270 which provides reasonable discrimination on inner parts of the tissue by fusing multi-angle  
271 acquisitions. Different from MARS, CShaper processes the stem in a more challenging  
272 way, segmenting single-direction membrane stack without the fusion stage. Because of  
273 the large shape difference between animal and plant cells, we retrained DMapNet with  
274 two segmentation results from the MARS. Negative segmentations were filtered when its  
275 volume deviates the average level too much. The comparison result is listed in **Supple-**  
276 **mentary Fig. S4**. Both MARS and CShaper show promising segmentations of cells at  
277 shallow layers. However, CShaper shows stronger results on inner parts with extreme-  
278 ly low intensity. Although DMapNet was trained with defective reference as shown in  
279 **Supplementary Fig. S4B, C and D**, CShaper escaped these irregular errors during the  
280 inference stage.

281 **Constrains of CShaper** CShaper provides new insights into the study of *C. elegans* em-  
282 bryogenesis at single-cell level, both in spatial and temporal aspects. First, to promote the  
283 accuracy of automatic *C. elegans* embryo segmentation, especially at later developmental  
284 stage, some constrains of CShaper need to be emphasized here. First, as the cell shape  
285 changes with time continuously, the temporal features between consecutive frames are

286 supposed to elevate the segmentation performance. LSTM, originally designed for natu-  
287 ral language process (NLP), is an obvious candidate to capture temporal features across  
288 time<sup>26</sup>. However, CShaper doesn't adopt LSTM-based model, such as convLSTM<sup>66</sup>, be-  
289 cause of the considerable computational resources involved in 3D convolution. We also  
290 find that the segmentation errors of CShaper concentrate at the top of the embryo, where  
291 the membrane signal intensity decreases critically because of the laser attenuation. In  
292 the framework of CShaper, potential strategies could be used to normalize the quality  
293 of top half embryo based on the bottom one. For example, Generative Adversarial Net-  
294 works (GAN) can be employed to transform low-quality images into the target with higher  
295 resolution<sup>40,45</sup>.

## 296 **Methods**

297 CShaper consists of three phases. The first step is to extract the membrane mask by deep  
298 learning based DMapNet. After that, Delaunay triangulation is used to cluster local mini-  
299 mum for the followed watershed segmentation. The negative segmentations and potential  
300 gaps among cells are filtered with the nucleus channel. The final cell shape lineage is con-  
301 structed based on the series information provided by the nucleus lineage. The framework  
302 of CShaper is shown in Fig. 4.

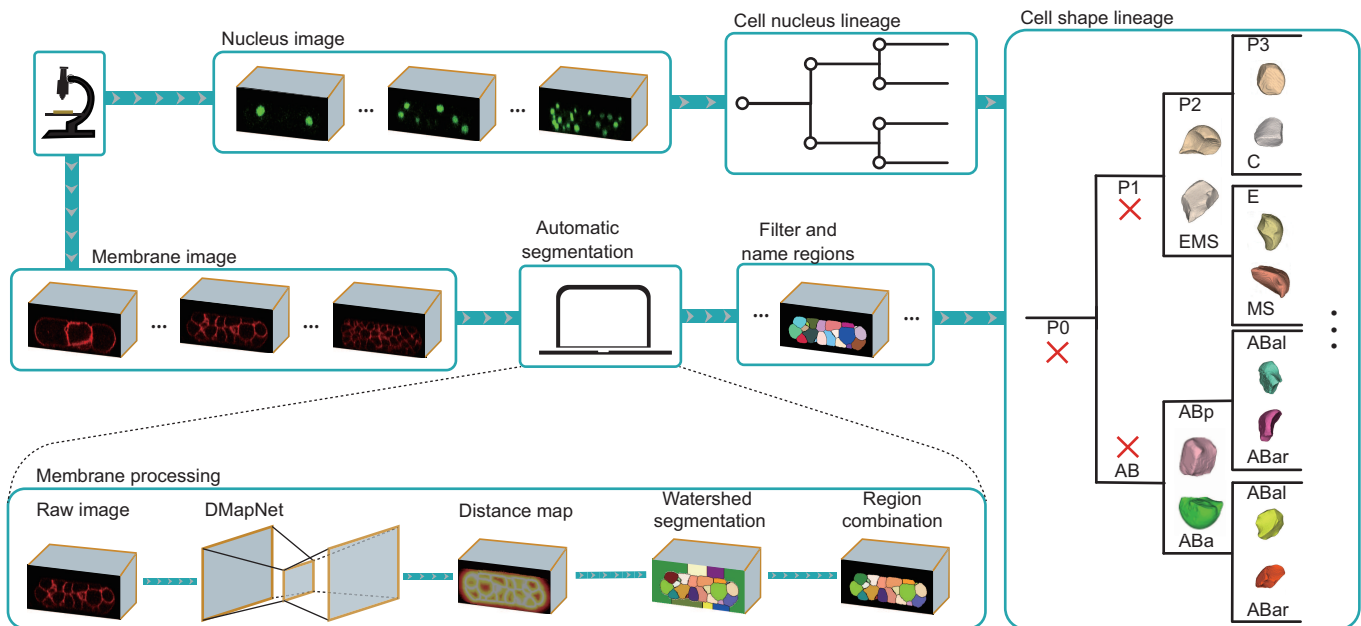

Figure 4: The framework of CShaper. Serial nucleus and membrane stacks are imaged simultaneously. For membrane image, CShaper is applied to segment the embryo at single-cell level automatically. Nucleus stack is processed by AceTree, which tracks nucleus through the entire development process. Finally, CShaper embedded cellular shape into the nucleus lineage.



303 **Distance Constrained Learning** The noise and physical imaging limitation degrade the  
304 quality of automatic segmentations. This problem prevails in embryo segmentation since  
305 the membrane enclosing a cell can be hardly imaged completely. DMapNet adopts a  
306 distance constrained learning to address the problem in segmenting noisy embryo images.  
307 By implicitly learning the distance map, the DMapNet is able to discriminate weak or even  
308 lost membrane signal.

309 With the membrane labelled as front label 1, the binary membrane annotation  $M^B$   
310 was prepared as discrete distance map  $M^D$  with

$$M^D(x, y, z) = \begin{cases} \min_{M^B(i,j,k)=1} ((x-i)^2 + (y-j)^2 + (z-k)^2) & \text{if } M^B(x, y, z) = 0 \\ 0 & \text{if } M^B(x, y, z) = 1 \end{cases} \quad (1)$$

$$M^D = \max(M^D) - M^D \quad (2)$$

312 In Eq. (2), we reversed the distance map to keep it monotonically decreasing from  
313 the membrane to the background. To relieve the burden on learning the distance where  
314 pixel was too away from the membrane to have recognizable signal,  $M^D$  was clipped to  
315 prevent long-range spatial dependencies. Then  $M^D$  was further discretized nonlinearly  
316 into  $M^{dmap}$ , the learning target, with smaller intervals around the membrane mask. The  
317 cross-entropy loss was used to evaluate the learning progress. However, different from  
318 traditional multi-classification, DMapNet should ideally provide a class distribution such

319 that the predicted class closer to the real class has higher probability than that is further  
320 away. For example, the penalty of predicting  $l = 1$  as  $l = 2$  should be smaller than that of  
321 the prediction  $l = 15$ . Therefore, the cross-entropy loss is weighted by the class distance  
322 as

$$l = \sum_{i=1}^N \sum_{k=1}^K \xi_k w_{i,k} (t_{i,k} \log p_{i,k} + (1 - t_{i,k}) \log(1 - p_{i,k})) \quad (3)$$

323 where  $\xi_k$  is the weight for each interval,  $w_{i,k}$  is the class distance weight for each pixel  $i$ ,  
324  $t_{i,k}$  is the  $k$ -th element of the one-hot target vector at pixel  $i$ , and  $p_{i,k}$  is the  $k$ -th channel  
325 of the network output at pixel  $i$ .  $N$  and  $K$  are the number of pixels and distance intervals,  
326 respectively. The  $K$ -th interval denotes the mask at the center of the membrane, while  
327 0-th class represents the background far away from the membrane. Larger weight  $w_k$  on  
328 classes closer to the membrane helps the network put more attention on cell boundary. The  
329 class distance weight  $w_{i,k}$  is calculated as

$$w_{i,k} = \exp\left(\frac{|k - D_i^{dmap}|}{K}\right) \quad (4)$$

330 where  $D_i^{dmap}$  is the real class at pixel  $i$ .

331 **Network structure** The structure of DMapNet is shown in **Supplementary Fig. S5**. Tak-  
332 ing the fully convolutional network as the backbone, DMapNet is constructed by consid-  
333 ering some specific problems in fluorescent images. In order to reduce 3D computational  
334 complexity, DMapNet utilizes inter-slice information by using  $3 \times 3 \times 1$  and  $1 \times 1 \times 3$  con-

335 volution successively. The dilation convolution, from the output of inner-slice convolution  
336 to its input, is added to enlarge the receptive field. The residual block is composed of two  
337 convolutional layers<sup>67</sup>. Parametric Rectified Linear Units (PReLU)<sup>68</sup> are used as the acti-  
338 vation layer. To help the higher layers retain the information from pixel, the input is scaled  
339 down and concatenated with the feature map, which also helps to train the network on cells  
340 in different sizes<sup>51</sup>. This is essential for segmenting cells when annotations corresponding  
341 to late development stage are not reliable. Feature maps at lower resolution are upsampled  
342 and concatenated together to generate the probability map. The membrane image volume  
343 is split into multiple overlapped slice series  $I_{D \times W \times H}$ , which are processed by DMapNet  
344 individually. The final prediction of whole volume  $M_{K \times (D-8) \times W \times H}^{prop}$  is achieved by pack-  
345 ing these predictions sequentially as discussed in Distance Constrained Learning. Then the  
346 discrete distance map can be derived by  $M^{pred}(z, x, y) = \max_{c=[1, \dots, K]} M^{prob}(c, z, x, y)$ .

347 **Automatic seeds clustering based on Delaunay triangulation** Till now, we have just  
348 obtained the discrete distance map  $M^{pred}$  from the DMapNet, as shown in Fig. 4. Wa-  
349 tershed segmentation is well suited for separating individual cells from the map, where  
350 black cell interiors are surrounded by bright boundaries. The learned map  $M^{pred}$ , includ-  
351 ing multiple discrete distance intervals, approximates the distance transformation on the  
352 latent binary membrane mask. With the holistic information embedded in the ordered  
353 intervals, cell boundaries can be extracted. However, watershed algorithm cannot be ap-

354 plied on  $M^{pred}$  directly because of redundant local minima and low distance resolution. In  
355 this part, Delaunay triangulation is employed to detect seeds for watershed segmentation  
356 automatically.

357 First, by selecting the  $K$ -th interval as the foreground mask  $M_K^{pred}$ , a reversed  
358 EDT was applied to  $M_K^{pred}$ , yielding  $I^{edt}$ . All local H-minima in  $I^{edt}$  are noted as  $\mathbf{S} =$   
359  $\{s_i\}_{i=1,\dots,S}$ , where  $S$  is number of local minima. In order to filter  $s_i$ s that belong to the  
360 same cell or background, a weighted graph  $\mathbf{G}$  is constructed. Edges  $\mathbf{E} = \{\mathbf{E}_1, \mathbf{E}_2\}$  in  $\mathbf{G}$   
361 come from two sources: one is the Delaunay triangulation on  $\mathbf{S}$ , noted as  $\mathbf{E}_1$ ; another one  
362 is the edges  $\mathbf{E}_2$  among all local minima locating on the boundary of the volume. Weight  
363 of the edge  $e_{ij}$  is defined as

$$\mathbf{W}(e_{ij}) = \begin{cases} \sum_{(x,y,z) \in e_{ij}} M_K^{pred}(x,y,z) & e_{ij} \in \mathbf{E}_1 \\ 0 & e_{ij} \in \mathbf{E}_2 \end{cases} \quad (5)$$

364 where  $(x, y, z) \in e_{ij}$  represents all points on the edge  $e_{ij}$ . The edge is moved from  
365  $\mathbf{E}$  if its weight is greater than the OTSU<sup>69</sup> threshold on  $\mathbf{W}$ . Finally, vertexes  $\mathbf{M}$  were  
366 clustered based on their connectivity. All  $s_i$ s in one cluster are regarded as one seed in the  
367 watershed segmentation stage. In the seeding procedure, a seed could possibly locate in a  
368 hollow gap between cells, giving rise to fake cell regions. Thus, nucleus stack was used  
369 to modify these errors. Owing to the impressive performance of DMapNet and automatic  
370 seeding, only intensity normalization was needed for nucleus image. Regions were set as

371 background when the cumulated intensity in the region is smaller than a threshold.

## References

1. Sulston, J. E., Schierenberg, E., White, J. G. & Thomson, J. The embryonic cell lineage of the nematode *Caenorhabditis elegans*. *Developmental Biology* **100**, 64–119 (1983).
2. Corsi, A. K., Wightman, B. & Chalfie, M. A transparent window into biology: a primer on *Caenorhabditis elegans*. *Genetics* **200**, 387–407 (2015).
3. Bao, Z. *et al.* Automated cell lineage tracing in *Caenorhabditis elegans*. *Proceedings of the National Academy of Sciences* **103**, 2707–2712 (2006).
4. Boyle, T. J., Bao, Z., Murray, J. I., Araya, C. L. & Waterston, R. H. Acetree: a tool for visual analysis of *Caenorhabditis elegans* embryogenesis. *BMC Bioinformatics* **7**, 275 (2006).
5. Murray, J. I., Bao, Z., Boyle, T. J. & Waterston, R. H. The lineaging of fluorescently-labeled *Caenorhabditis elegans* embryos with StarryNite and AceTree. *Nature Protocols* **1**, 1468 (2006).

6. Ho, V. W. S. *et al.* Systems-level quantification of division timing reveals a common genetic architecture controlling asynchrony and fate asymmetry. *Molecular Systems Biology* **11**, 814 (2015).
7. Murray, J. I. *et al.* Multidimensional regulation of gene expression in the *C. elegans* embryo. *Genome Research* **22**, 1282–1294 (2012).
8. Moore, J. L., Du, Z. & Bao, Z. Systematic quantification of developmental phenotypes at single-cell resolution during embryogenesis. *Development* **140**, 3266–3274 (2013).
9. Hench, J., Henriksson, J., Lüppert, M. & Bürglin, T. R. Spatio-temporal reference model of *Caenorhabditis elegans* embryogenesis with cell contact maps. *Developmental Biology* **333**, 1–13 (2009).
10. Chen, L. *et al.* Establishment of signaling interactions with cellular resolution for every cell cycle of embryogenesis. *Genetics* **209**, 37–49 (2018).
11. Azuma, Y. & Onami, S. Biologically constrained optimization based cell membrane segmentation in *C. elegans* embryos. *BMC Bioinformatics* **18**, 307 (2017).
12. Wang, Z., Wang, D., Li, H. & Bao, Z. Cell neighbor determination in the metazoan embryo system. In *Proceedings of the 8th ACM International Conference on Bioinformatics, Computational Biology, and Health Informatics*, 305–312 (ACM, 2017).

13. Arata, Y., Takagi, H., Sako, Y. & Sawa, H. Power law relationship between cell cycle duration and cell volume in the early embryonic development of *Caenorhabditis elegans*. *Frontiers in Physiology* **5**, 529 (2015).
14. Fickentscher, R., Struntz, P. & Weiss, M. Setting the clock for fail-safe early embryogenesis. *Physical Review Letters* **117**, 188101 (2016).
15. Fickentscher, R., Krauss, S. W. & Weiss, M. Anti-correlation of cell volumes and cell-cycle times during the embryogenesis of a simple model organism. *New Journal of Physics* **20**, 113001 (2018).
16. Galli, M. & Morgan, D. O. Cell size determines the strength of the spindle assembly checkpoint during embryonic development. *Developmental Cell* **36**, 344–352 (2016).
17. Gönczy, P. & Rose, L. S. Asymmetric cell division and axis formation in the embryo. *WormBook Otc* **15**, 1–20 (2005).
18. Rose, L. & Gönczy, P. Polarity establishment, asymmetric division and segregation of fate determinants in early *C. elegans* embryos. *WormBook Dec* **30**, 1–43 (2005).
19. Thorpe, C. J., Schlesinger, A., Carter, J. C. & Bowerman, B. Wnt signaling polarizes an early *C. elegans* blastomere to distinguish endoderm from mesoderm. *Cell* **90**, 695–705 (1997).

20. Walston, T. *et al.* Multiple Wnt signaling pathways converge to orient the mitotic spindle in early *C. elegans* embryos. *Developmental cell* **7**, 831–841 (2004).
21. Pilot, F. & Lecuit, T. Compartmentalized morphogenesis in epithelia: from cell to tissue shape. *Developmental Dynamics: an Official Publication of the American Association of Anatomists* **232**, 685–694 (2005).
22. Lecuit, T. & Lenne, P.-F. Cell surface mechanics and the control of cell shape, tissue patterns and morphogenesis. *Nature Reviews Molecular Cell Biology* **8**, 633 (2007).
23. Gómez-Gálvez, P. *et al.* Scutoids are a geometrical solution to three-dimensional packing of epithelia. *Nature Communications* **9**, 2960 (2018).
24. Xu, M., Wu, Y., Shroff, H., Wu, M. & Mani, M. A scheme for 3-dimensional morphological reconstruction and force inference in the early *C. elegans* embryo. *PLOS ONE* **13**, e0199151 (2018).
25. Erick, M. *et al.* Deep learning for cellular image analysis. *Nature Methods* (2019).
26. Belthangady, C. & Royer, L. A. Applications, promises, and pitfalls of deep learning for fluorescence image reconstruction. *Nature Methods* **1** (2019).



27. Nath, S. K., Palaniappan, K. & Bunyak, F. Cell segmentation using coupled level sets and graph-vertex coloring. In *International Conference on Medical Image Computing and Computer-Assisted Intervention*, 101–108 (Springer, 2006).
28. Tareef, A. *et al.* Multi-pass fast watershed for accurate segmentation of overlapping cervical cells. *IEEE Transactions on Medical Imaging* **37**, 2044–2059 (2018).
29. Koyuncu, C. F., Akhan, E., Ersahin, T., Cetin-Atalay, R. & Gunduz-Demir, C. Iterative h-minima-based marker-controlled watershed for cell nucleus segmentation. *Cytometry Part A* **89**, 338–349 (2016).
30. Koyuncu, C. F., Cetin-Atalay, R. & Gunduz-Demir, C. Object-oriented segmentation of cell nuclei in fluorescence microscopy images. *Cytometry Part A* **93**, 1019–1028 (2018).
31. Cooper, S., Barr, A. R., Glen, R. & Bakal, C. NucliTrack: an integrated nuclei tracking application. *Bioinformatics* **33**, 3320–3322 (2017).
32. Li, F., Zhou, X., Zhao, H. & Wong, S. T. Cell segmentation using front vector flow guided active contours. In *International Conference on Medical Image Computing and Computer-Assisted Intervention*, 609–616 (Springer, 2009).

33. Seroussi, I., Veikherman, D., Ofer, N., Yehudai-Resheff, S. & Keren, K. Segmentation and tracking of live cells in phase-contrast images using directional gradient vector flow for snakes. *Journal of Microscopy* **247**, 137–146 (2012).
34. Molnar, C. *et al.* Accurate morphology preserving segmentation of overlapping cells based on active contours. *Scientific Reports* **6**, 32412 (2016).
35. Dimopoulos, S., Mayer, C. E., Rudolf, F. & Stelling, J. Accurate cell segmentation in microscopy images using membrane patterns. *Bioinformatics* **30**, 2644–2651 (2014).
36. Kiss, A. *et al.* Segmentation of 3D images of plant tissues at multiple scales using the level set method. *Plant Methods* **13**, 114 (2017).
37. Sharp, T. A., Merkel, M., Manning, M. L. & Liu, A. J. Inferring statistical properties of 3D cell geometry from 2D slices. *PLoS ONE* **14**, 1–18 (2019).
38. Xing, F. & Yang, L. Robust nucleus/cell detection and segmentation in digital pathology and microscopy images: a comprehensive review. *IEEE Reviews in Biomedical Engineering* **9**, 234–263 (2016).
39. Weigert, M. *et al.* Content-aware image restoration: pushing the limits of fluorescence microscopy. *Nature Methods* **15**, 1090 (2018).

40. Weigert, M., Royer, L., Jug, F. & Myers, G. Isotropic reconstruction of 3D fluorescence microscopy images using convolutional neural networks. In *International Conference on Medical Image Computing and Computer-Assisted Intervention*, 126–134 (Springer, 2017).
41. Lee, S., Han, S., Salama, P., Dunn, K. W. & Delp, E. J. Three dimensional blind image deconvolution for fluorescence microscopy using generative adversarial networks. *arXiv preprint arXiv:1904.09974* (2019).
42. Zhang, H. *et al.* High-throughput, high-resolution deep learning microscopy based on registration-free generative adversarial network. *Biomedical Optics Express* **10**, 1044–1063 (2019).
43. Huo, Y. *et al.* Synseg-net: Synthetic segmentation without target modality ground truth. *IEEE Transactions on Medical Imaging* **38**, 1016–1025 (2018).
44. Karimi, D. *et al.* Accurate and robust deep learning-based segmentation of the prostate clinical target volume in ultrasound images. *Medical Image Analysis* **57**, 186–196 (2019).
45. Ounkomol, C., Seshamani, S., Maleckar, M. M., Collman, F. & Johnson, G. R. Label-free prediction of three-dimensional fluorescence images from transmitted-light microscopy. *Nature Methods* **15**, 917–920 (2018).

46. Boyd, N., Jonas, E., Babcock, H. P. & Recht, B. DeepLoco: Fast 3D localization microscopy using neural networks. *bioRxiv preprint bioRxiv: 267096* (2018).
47. Han, L., Murphy, R. F. & Ramanan, D. Learning generative models of tissue organization with supervised gans. In *2018 IEEE Winter Conference on Applications of Computer Vision (WACV)*, 682–690 (IEEE, 2018).
48. Christiansen, E. M. *et al.* *In silico* labeling: Predicting fluorescent labels in unlabeled images. *Cell* **173**, 792–803 (2018).
49. Ronneberger, O., Fischer, P. & Brox, T. U-net: Convolutional networks for biomedical image segmentation. In *International Conference on Medical Image Computing and Computer-assisted Intervention*, 234–241 (Springer, 2015).
50. Shen, D., Wu, G. & Suk, H.-I. Deep learning in medical image analysis. *Annual Review of Biomedical Engineering* **19**, 221–248 (2017).
51. Raza, S. E. A. *et al.* Micro-net: A unified model for segmentation of various objects in microscopy images. *Medical Image Analysis* **52**, 160–173 (2019).
52. Murata, T., Hotta, K., Imanishi, A., Matsuda, M. & Terai, K. Segmentation of cell membrane and nucleus using branches with different roles in deep neural network. In *11th International Conference on Bio-Inspired Systems and Signal Processing*,

*BIOSIGNALS 2018-Part of 11th International Joint Conference on Biomedical Engineering Systems and Technologies, BIOSTEC 2018*, 256–261 (2018).

53. Eschweiler, D. *et al.* CNN-based preprocessing to optimize watershed-based cell segmentation in 3D confocal microscopy images. *arXiv preprint arXiv:1810.06933* (2018).
54. Gonda, F., Wei, D., Parag, T. & Pfister, H. Parallel separable 3D convolution for video and volumetric data understanding. *arXiv preprint arXiv:1809.04096* (2018).
55. Ye, R., Liu, F. & Zhang, L. 3D depthwise convolution: Reducing model parameters in 3D vision tasks. *arXiv preprint arXiv:1808.01556* (2018).
56. Ni, T., Xie, L., Zheng, H., Fishman, E. K. & Yuille, A. L. Elastic boundary projection for 3D medical imaging segmentation. *arXiv preprint arXiv:1812.00518* (2018).
57. Brügger, R., Baumgartner, C. F. & Konukoglu, E. A partially reversible U-Net for memory-efficient volumetric image segmentation. *arXiv preprint arXiv:1906.06148* (2019).
58. Cao, J., Wong, M.-K., Zhao, Z. & Yan, H. 3DMMS: robust 3D membrane morphological segmentation of *C. elegans* embryo. *BMC Bioinformatics* **20**, 176 (2019).

59. Yushkevich, P. A., Gao, Y. & Gerig, G. ITK-SNAP: An interactive tool for semi-automatic segmentation of multi-modality biomedical images. In *2016 38th Annual International Conference of the IEEE Engineering in Medicine and Biology Society (EMBC)*, 3342–3345 (IEEE, 2016).
60. Guan, G. *et al.* System-level quantification and phenotyping of early embryonic morphogenesis of *Caenorhabditis elegans*. *bioRxiv preprint bioRxiv: 776062* (2019).
61. Priess, J. R. Notch signaling in the *C. elegans* embryo. *WormBook Jun 25*, 1–16 (2005).
62. Li, X. *et al.* Systems properties and spatiotemporal regulation of cell position variability during embryogenesis. *Cell reports 26*, 313–321 (2019).
63. Langenhan, T. *et al.* Latrophilin signaling links anterior-posterior tissue polarity and oriented cell divisions in the *C. elegans* embryo. *Developmental Cell 17*, 494–504 (2009).
64. Willis, L. *et al.* Cell size and growth regulation in the *Arabidopsis thaliana* apical stem cell niche. *Proceedings of the National Academy of Sciences 113*, E8238–E8246 (2016).
65. Fernandez, R. *et al.* Imaging plant growth in 4D: robust tissue reconstruction and lineaging at cell resolution. *Nature Methods 7*, 547–553 (2010).

66. Xingjian, S. *et al.* Convolutional LSTM network: A machine learning approach for precipitation nowcasting. In *Advances in Neural Information Processing Systems*, 802–810 (2015).
67. Wang, G., Li, W., Ourselin, S. & Vercauteren, T. Automatic brain tumor segmentation using cascaded anisotropic convolutional neural networks. In *International MICCAI Brainlesion Workshop*, 178–190 (Springer, 2017).
68. Zhang, Y.-D., Pan, C., Chen, X. & Wang, F. Abnormal breast identification by nine-layer convolutional neural network with parametric rectified linear unit and rank-based stochastic pooling. *Journal of Computational Science* **27**, 57–68 (2018).
69. Otsu, N. A threshold selection method from gray-level histograms. *IEEE Transactions on Systems, Man, and Cybernetics* **9**, 62–66 (1979).

**Acknowledgements** The strains were provided by the *C. elegans* Genetic Center (CGC), which is funded by National Institutes of Health, Office of Research Infrastructure Programs, Grant P40 OD010440. This work was supported by the Hong Kong Research Grants Council (HKBU12100118, HKBU12100917, HKBU12123716), the HKBU Interdisciplinary Research Cluster Fund, the Ministry of Science and Technology of China (2015CB910300), the National Natural Science Foundation of China (91430217), Hong Kong Research Grants Council (Project C1007-15G) and City University of Hong Kong (Project 9610460).

**Author Contributions** H.Y., Z.Z., C.T. conceived and coordinated the study. J.C. designed the cell-segmentation algorithm ; G.G. analysed the segmentation results. M.W., L.C. performed imaging and embryo curation. Z.Z. provided reagents and experimental methods. J.C., G.G. wrote the manuscript ; H.Y., Z.Z., C.T. revised the manuscript. All the authors reviewed the results and approved the final version of the manuscript.

**Competing Interests** The authors declare that they have no competing financial interests.

**Correspondence** Correspondence and requests for materials should be addressed to Chao Tang, Zhongying Zhao, Hong Yan. (email: [tangc@pku.edu.cn](mailto:tangc@pku.edu.cn), [zyzhao@hkbu.edu.hk](mailto:zyzhao@hkbu.edu.hk), [h.yan@cityu.edu.hk](mailto:h.yan@cityu.edu.hk)).



## Supplementary

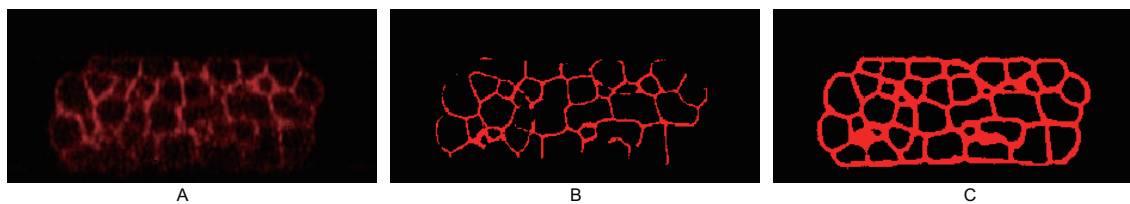

Figure S1: Comparison of CShaper and naive binary segmentations. (A) Raw image. (B) and (C) are segmentations of naive binary and CShaper, respectively.

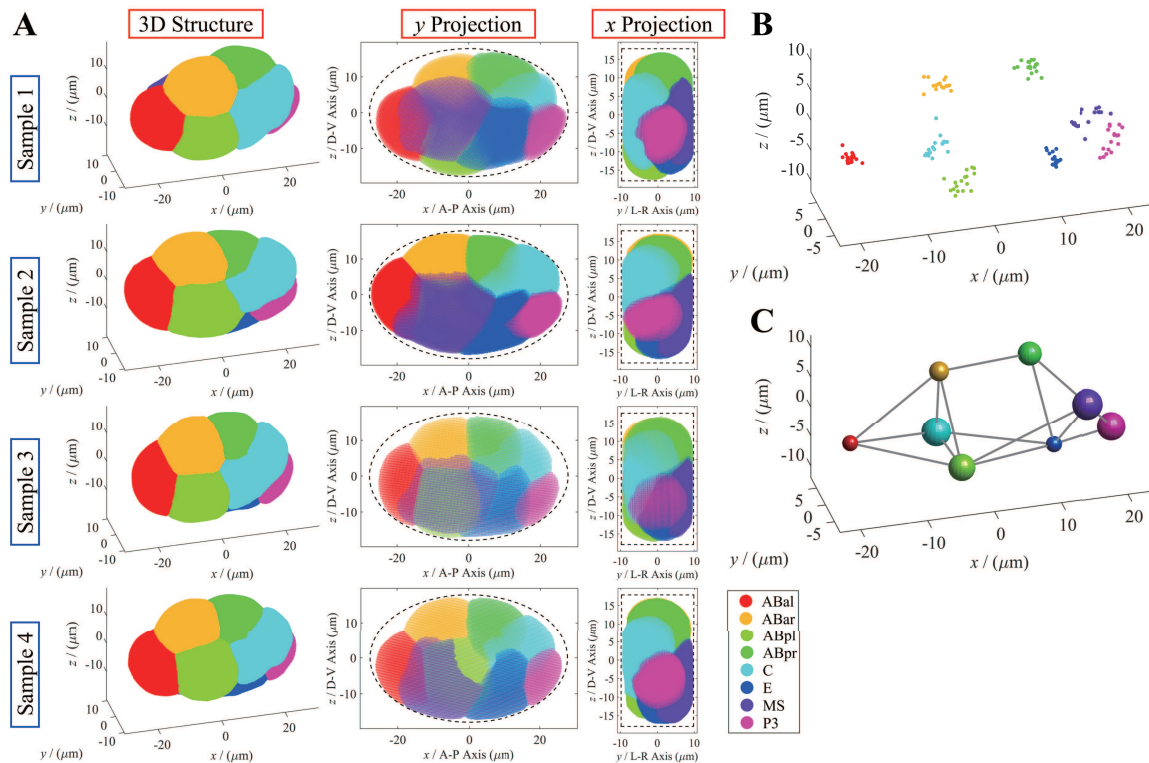

Figure S2: Spatio-temporal reference of wild-type *C. elegans* embryonic morphogenesis. Take the 8-cell stage for example and illustration.  $x$ ,  $y$ ,  $z$  axes represent anterior-posterior (A-P), left-right (L-R), dorsal-ventral (D-V) axes respectively. Each color represents one specific cell identity, noted in legend. (A) 3D structure,  $y$  projection and  $x$  projection of cell morphology in 4 wild-type embryo samples. (B) Distribution of nucleus position in 17 wild-type embryo samples. Each point represents a cell's nucleus position in one embryo sample. (C) Spatial deviation and cell-cell contact mapping. Radius of sphere represents spatial deviation  $\Delta r_{\text{STD}}$  defined by  $\Delta r_{\text{STD}} = [(\sum_{i=1}^N |\mathbf{r}_i - \bar{\mathbf{r}}|^2)/N]^{1/2}$ ; gray lines represent reproducible and effective contact between cells, under arbitrary filter criteria ( $S_{\text{contact}}/S_{\text{surface}} > 1/36$ ;  $T_{\text{contact}} \geq 3\text{min}$ ;  $N_{\text{replicate}} = N_{\text{embryo}}$ ).

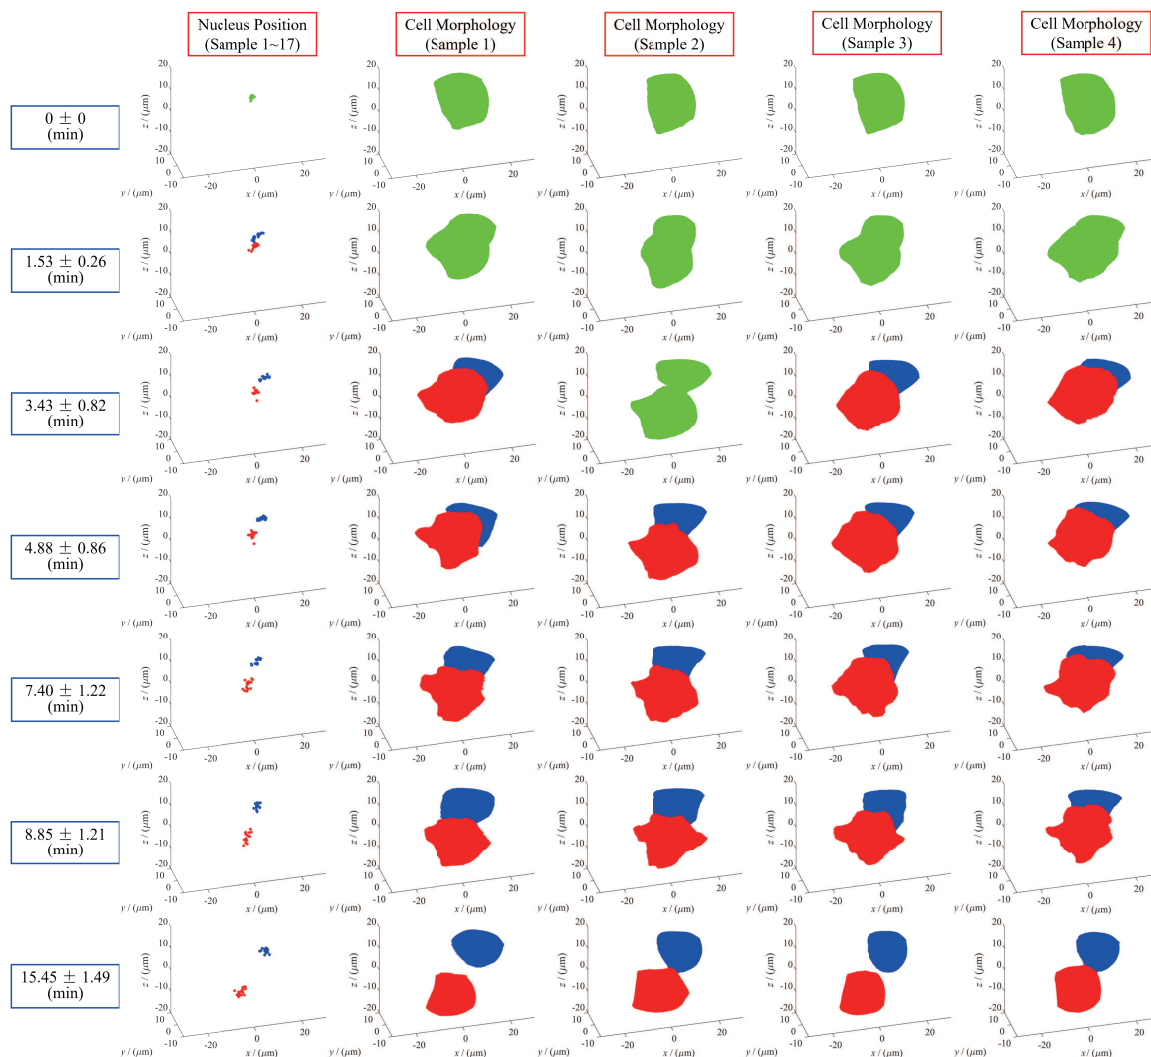

Figure S3: 4-dimensional morphological evolution during *C. elegans* embryogenesis. Take ABp and its daughters ABpl, ABpr as example and illustration.  $x, y, z$  axes represent anterior-posterior (A-P), left-right (L-R), dorsal-ventral (D-V) axes respectively. Green, ABa ; red, ABpl ; blue, ABpr. Evolution dynamics is shown in rows which represent different developmental timing noted on left (Tabel. S2). The first column is nucleus-position distribution from 17 wild-type embryo samples. The second to fifth columns are reconstructed cell morphology from the 4 wild-type embryo samples.

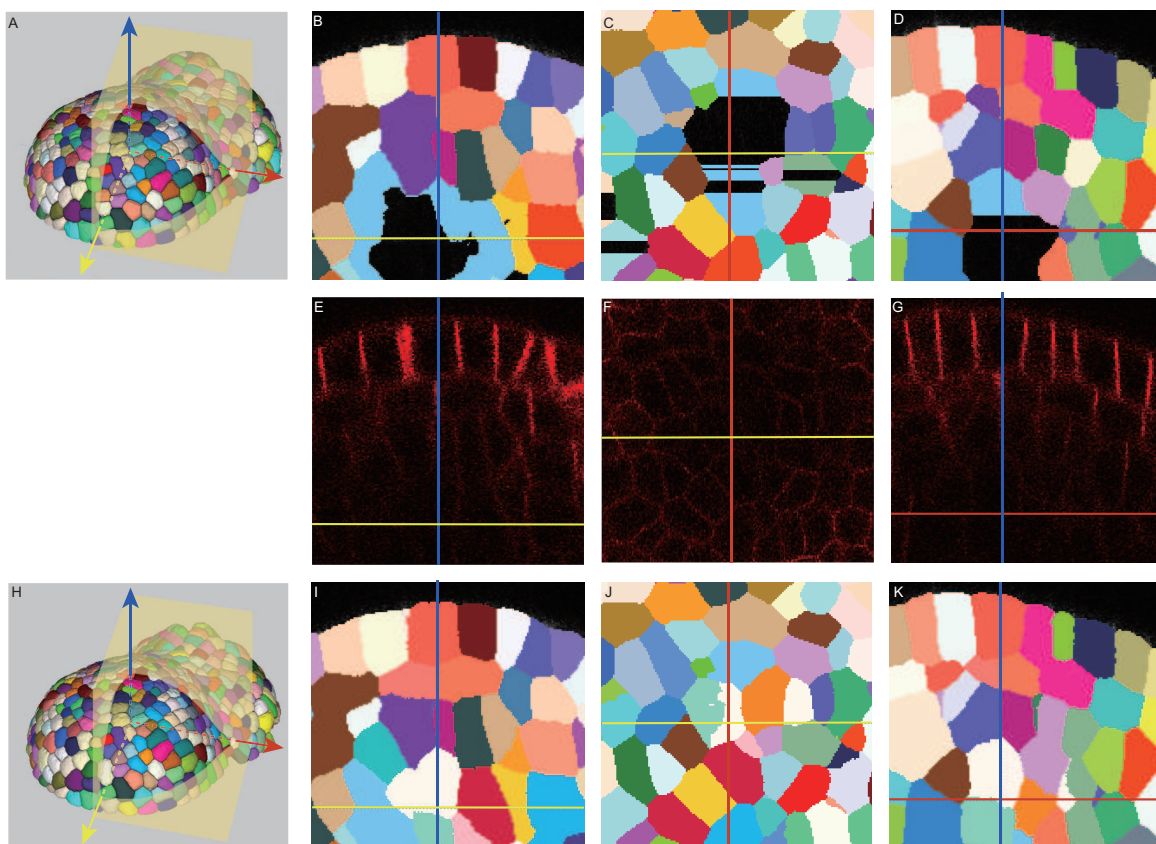

Figure S4: The application of CShaper on plant tissue. (A, H) are segmentations of MARS and CShaper shown in 3D. (B-D, (E-G) and (I-K) are three orthogonal sections of MARS's segmentation, raw image and CShaper's segmentation, respectively.

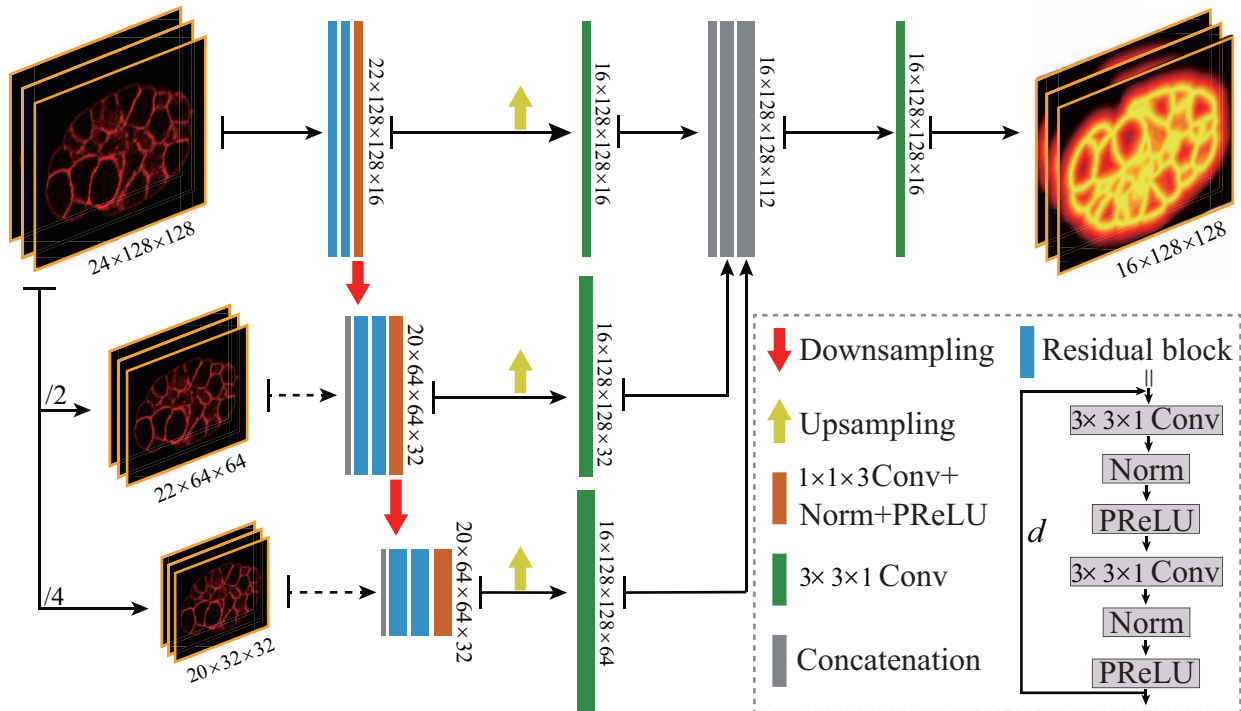

Figure S5: Network structure of DMapNet. Multiple neighboring slices are processed by three residual blocks at three different levels consecutively. Feature maps at high levels are resized into the same size as the input image with linear interpolation. In order to remedy the lost information, raw images are downsampled and concatenated into the feature maps. The complete distance map of one volume is achieved by combining multiple predictions.

Table S1: Datasets (with membrane marker) description

| Dataset                | Name of Wild-Type Embryo                                                          | With Annotation | Usage                                                   |
|------------------------|-----------------------------------------------------------------------------------|-----------------|---------------------------------------------------------|
| Training               | 170704plc1p2{27}, 181215plc1p1{27}                                                | Yes             | Training DMapNet                                        |
| Testing                | 170704plc1p2 {7}, 181210plc1p3{7},<br>190314plc1p3 {7}                            | Yes             | Comparing methods                                       |
| Reference construction | 170704plc1p2 {200}, 181210plc1p1 {200},<br>181210plc1p2 {200}, 181210plc1p3 {200} | No              | Extensive evaluation and spatio-temporal reconstruction |

Note: Number in the bracket {\*} represents the frames in the wide type.

Table S2: Time segmentation on developmental process from 4- to 350-cell stage.

| Division Event | First Moment (min) | Last Moment (min) | Division Event | First Moment (min) | Last Moment (min) |
|----------------|--------------------|-------------------|----------------|--------------------|-------------------|
| AB2            | /                  | 0.00±0.00 {01}    | E1             | 4.88±0.86 {04}     | 22.29±1.82 {10}   |
| AB4            | 1.53±0.26 {02}     | 15.45±1.49 {07}   | E2             | 23.74±1.87 {12}    | 62.21±4.53 {25}   |
| AB8            | 17.67±1.30 {08}    | 32.25±2.83 {15}   | E4             | 65.69±5.01 {26}    | 106.92±5.34 {39}  |
| AB16           | 35.21±3.22 {18}    | 56.47±3.80 {23}   | E8             | 113.14±5.66 {41}   | 175.11±6.86 {52}  |
| AB32           | 60.92±4.11 {24}    | 84.84±5.15 {32}   | E16            | 191.30±6.79 {54}   | /                 |
| AB64           | 92.25±5.15 {34}    | 118.51±5.60 {44}  | C1             | 8.85±1.21 {06}     | 25.92±2.60 {13}   |
| AB128          | 134.41±6.13 {46}   | 159.97±4.64 {50}  | C2             | 27.37±2.61 {14}    | 49.85±3.47 {21}   |
| AB256          | 190.98±4.70 {53}   | /                 | C4             | 51.91±3.65 {22}    | 81.15±4.85 {31}   |
| EMS            | /                  | 3.43±0.82 {03}    | C8             | 88.20±5.55 {33}    | 115.85±6.12 {43}  |
| P2             | /                  | 7.40±1.22 {05}    | C16            | 143.16±7.27 {47}   | /                 |
| MS1            | 4.88±0.86 {04}     | 21.18±1.71 {09}   | D1             | 34.38±2.90 {16}    | 68.21±5.97 {28}   |
| MS2            | 22.63±1.76 {11}    | 42.00±3.12 {19}   | D2             | 69.66±5.98 {29}    | 112.53±6.83 {40}  |
| MS4            | 43.96±3.43 {20}    | 67.75±4.55 {76}   | D4             | 115.77±7.34 {42}   | 155.45±7.15 {49}  |
| MS8            | 72.20±4.91 {30}    | 97.58±5.76 {35}   | D8             | 163.81±7.13 {51}   | /                 |
| MS16           | 104.74±6.14 {38}   | 130.54±6.05 {45}  | P3             | 8.85±1.21 {06}     | 32.93±2.88 {16}   |
| MS32           | 153.27±6.10 {48}   | /                 | P4             | 34.38±2.90 {17}    | 99.90±6.89 {36}   |
|                |                    |                   | Z2/Z3          | 101.35±6.90 {37}   | /                 |

Note: Number in the bracket{\*} represents the order of the 54 division events (frames).

Table S3: Cells with missing information during 4- to 350-cell stage in the 4 embryos expressing membrane marker (30.7%).

|                                                       |                                              |             |             |             |              |              |              |
|-------------------------------------------------------|----------------------------------------------|-------------|-------------|-------------|--------------|--------------|--------------|
| AB Lineage<br>(81 / 254, 31.9 %)                      | 'ABalp'                                      | 'ABalpp'    | 'ABaraa'    | 'ABplap'    | 'ABplpp'     | 'ABalpap'    | 'ABpraaa'    |
|                                                       | 'ABpraap'                                    | 'ABprpap'   | 'ABalapap'  | 'ABaraaaa'  | 'ABarappa'   | 'ABarpaaa'   | 'ABarpaap'   |
|                                                       | 'ABarppaa'                                   | 'ABarpppa'  | 'ABplapaa'  | 'ABprapaa'  | 'ABprappp'   | 'ABalaaaal'  | 'ABalaaaar'  |
|                                                       | 'ABalaaapp'                                  | 'ABalaapaa' | 'ABalaapap' | 'ABalaappa' | 'ABalapaaa'  | 'ABalapaap'  | 'ABalapapa'  |
|                                                       | 'ABalappaa'                                  | 'ABalappap' | 'ABalapppa' | 'ABalpaaaa' | 'ABalppaap'  | 'ABarapaaa'  | 'ABarapapa'  |
|                                                       | 'ABarappaa'                                  | 'ABarappap' | 'ABarpaaaa' | 'ABarpaaap' | 'ABarpaapa'  | 'ABarpaapp'  | 'ABarpapaa'  |
|                                                       | 'ABarpapap'                                  | 'ABarpappa' | 'ABarppaaa' | 'ABarppaap' | 'ABarppapa'  | 'ABarppapp'  | 'ABarpppaa'  |
|                                                       | 'ABarppppa'                                  | 'ABarppppp' | 'ABplaaaa'  | 'ABplaaaap' | 'ABplaaaapa' | 'ABplaaapaa' | 'ABplaaapap' |
|                                                       | 'ABplapaaa'                                  | 'ABplapaap' | 'ABplapapa' | 'ABplapppa' | 'ABplapppp'  | 'ABplpaaaap' | 'ABplpappp'  |
|                                                       | 'ABplppapp'                                  | 'ABplpppaa' | 'ABplpppap' | 'ABplppppp' | 'ABpraaaaa'  | 'ABpraaaap'  | 'ABpraapaa'  |
|                                                       | 'ABpraapap'                                  | 'ABprapaaa' | 'ABprapaap' | 'ABprapapa' | 'ABprapapp'  | 'ABprapppa'  | 'ABprapppp'  |
|                                                       | 'ABprpaaap'                                  | 'ABprpappp' | 'ABprppaaa' | 'ABprppppp' | /            | /            | /            |
|                                                       | <sup>48</sup> MS Lineage<br>(6 / 31, 19.4 %) | 'MSap'      | 'MSaap'     | 'MSaaap'    | 'MSaapp'     | 'MSappa'     | 'MSppap'     |
| E Lineage<br>(5 / 15, 33.3 %)                         | 'Ealp'                                       | 'Eara'      | 'Earp'      | 'Epla'      | 'Epra'       | /            | /            |
| C Lineage<br>(6 / 15, 40 %)                           | 'Ca'                                         | 'Cp'        | 'Cap'       | 'Caap'      | 'Capa'       | 'Cpap'       | /            |
| D Lineage<br>(2 / 7, 28.6 %)                          | 'D'                                          | 'Dap'       | /           | /           | /            | /            | /            |
| Others<br>( 'EMS', 'P2', 'P3', 'P4' )<br>(0 / 4, 0 %) | /                                            | /           | /           | /           | /            | /            | /            |

Note: For AB2, EMS, P2 with incomplete lifespan recorded, only duration between 4-cell stage and 8-cell stage was considered ; for AB4-AB128, MS1-MS16, E1-E8, C1-C8, D1-D4, P3, P4 which have complete cell cycle in all the 17 wild-type embryos, all the time points in their lives were taken into account ; for each cell, if the membrane signal is too dim at any time point and cause failure in precise cell segmentation, the cell would be regarded invalid with missing information.



**Note 1:** In CShaper, there are three discriminative situations where nucleus derived from AceTree cannot be found:

1. The boundary between two cells (not sisters) is too weak to be extracted by DMapNet, therefore, two cells are segmented as one cell during the watershed transformation;
2. Membrane signal is lost at boundary of the embryo, which leads to the leakage of the background into the embryo;
3. In CShaper, we determine the accomplishment of division stage by checking the signal intensity on the line between sister cells' nuclei. However, when the intensity drops at the middle of lifespan, the sister cells may be combined as their mother cell, leading to missing cells.

We exclude these mistakes by combining the nucleus lineage from AceTree and segmentations from CShaper.
